1 **Host species determine symbiotic community composition in Antarctic**  
2 **sponges (Porifera: Demospongiae)**

3

4 Oriol Sacristán-Soriano<sup>1,2, †</sup>, Natalia Pérez Criado<sup>3</sup> and Conxita Avilàs

5

6 <sup>1</sup>Department of Biology; University of Richmond; Richmond, VA, USA

7 <sup>2</sup>Centro de Estudios Avanzados de Blanes (CEAB, CSIC), Blanes, Spain

8 <sup>3</sup>Department of Evolutionary Biology, Ecology and Environmental Sciences; Faculty of Biology,  
9 and IRBio; University of Barcelona; Barcelona, Catalonia

10 †Corresponding author

11

12 **Keywords:** Antarctic Peninsula, South Shetland Islands, sponge holobiont, Archaea, benthic  
13 ecology.

14

15 **Abstract**

16 The microbiota of four Antarctic sponges, *Dendrilla antarctica*, *Sphaerotylus antarcticus*,  
17 *Mycale acerata*, and *Hemigellius pilosus*, collected at two South Shetland Islands and at two  
18 locations in the Antarctic Peninsula separated by ca. 670 km, were analyzed together with  
19 surrounding seawater. We used high throughput sequencing of the V4 region of the 16S rRNA  
20 gene common to Bacteria and Archaea to investigate the microbial diversity and community  
21 composition. Our study reveals that sponge-associated prokaryote communities are consistently  
22 detected within a particular sponge species regardless of the collection site. Their community  
23 structure and composition are typical of low microbial abundance (LMA) sponges. We conclude  
24 that prokaryote communities from Antarctic sponges are less diverse and differ in their  
25 composition compared to those in the water column. Microbiome analysis indicates that  
26 Antarctic sponges harbor a strict core consisting of seven OTUs, and a small variable community  
27 comprising several tens of OTUs. Two abundant prokaryotes from the variable microbiota that  
28 are affiliated to the archaeal and bacterial phyla Thaumarchaeota and Nitrospirae may be  
29 involved in the sponge nitrification process and might be relevant components of the nitrogen  
30 cycling in Antarctica. The likely generalist nature of dominant microbes and the host-specific  
31 structure of symbiont communities suggest that these Antarctic sponges represent different  
32 ecological niches for particular microbial enrichments.

33

34

35

36

37

## 38 **Introduction**

39 Sponges (phylum Porifera) are sessile organisms widely distributed from the tropics to the poles  
40 (Hooper and Van Soest 2004), and ecologically important constituents of benthic environments  
41 from shallow to deep waters (Bell 2008). Sponges form symbioses with diverse and  
42 metabolically active microorganisms that make valuable contributions to many aspects of the  
43 sponge's physiology and ecology (Taylor et al. 2007). For that reason, the concept 'sponge  
44 holobiont' was introduced to refer to the sponge host and the consortium of bacteria, archaea,  
45 algae, fungi, and viruses that reside within it (Webster and Taylor 2012). Marine sponge-  
46 associated prokaryotic communities have been widely studied, being reported to be highly  
47 complex (Thomas et al. 2016). Sponges host (even at low relative abundances) over 60 bacterial  
48 and 4 archaeal phyla (Reveillaud et al. 2014; Thomas et al. 2016; Moitinho-Silva et al. 2017a).  
49 Despite the continuous flux of seawater through their canal system, sponges are able to maintain  
50 a specific microbial composition remarkably different from the ambient seawater (Thomas et al.  
51 2016; Hill and Sacristán-Soriano 2017). Furthermore, these associations appear to be host-  
52 specific and stable under different environmental conditions (Hentschel et al. 2002; Lee et al.  
53 2011; Erwin et al. 2012b; Schmitt et al. 2012; Pita et al. 2013; Reveillaud et al. 2014). Although  
54 sponge-microbial interactions seem to be consistent over geographic regions, there are some  
55 apparent geographical gaps in the study of host-associated prokaryotic assemblages.

56

57 Antarctic marine habitats are characterized by their uniqueness and almost intact virginity that  
58 experience extreme environmental conditions and a marked seasonality. The geographical  
59 isolation and the cyclical sea-ice formation make these ecosystems largely unexplored. Sponges  
60 are also important components of marine benthic communities in Antarctica and play key roles

61 in community structure and nutrition cycling, also providing microhabitats for other invertebrates  
62 (McClintock et al. 2005; Angulo-Preckler et al. 2018). Few studies have examined the microbial  
63 diversity present in Antarctic marine sponges (Lo Giudice et al. 2019). There have been several  
64 approximations to unravel the composition of Antarctic microbial communities associated to  
65 sponges, but primarily focused on eukaryotic microorganisms (Bavestrello et al. 2000; Cerrano  
66 et al. 2000; Cerrano et al. 2004; Henríquez et al. 2014). However, the most comprehensive  
67 studies describing microbial communities associated to Antarctic sponges using classic and high  
68 throughput sequencing described a total prokaryotic composition of 26 bacterial and 3 archaeal  
69 phyla and the presence of 8 eukaryotic groups (Webster et al. 2004; Rodríguez-Marconi et al.  
70 2015; Cárdenas et al. 2018; Steinert et al. 2019; Cárdenas et al. 2019). Recently, functional  
71 metagenomics has been used to characterize the community composition and metabolic potential  
72 of microbiomes of two Antarctic sponges (Moreno-Pino et al. 2020). In the Bacteria domain  
73 those assemblages primarily clustered within the Gamma and Alphaproteobacteria followed by  
74 the Bacteroidetes phylum. In the Archaea domain, Crenarchaeota and Thaumarchaeota  
75 representatives were mostly associated to Antarctic sponges. Within the Eukarya domain, fungi  
76 were predominately in association with sponges in Antarctica followed by diatoms and  
77 dinoflagellates (Lo Giudice et al. 2019).

78  
79 Since the rapid development in massive sequencing methodologies, allowing for a more  
80 complete characterization of the sponge microbiomes, the specificity of the associated  
81 microorganisms is under debate. Several bacterial taxa have been reported as sponge-specific  
82 bacteria (i.e., bacterial lineages found only in sponges and not in ambient seawater or sediments)  
83 (Taylor et al. 2007). However, other studies have showed that several bacterial taxa thought to be

84 specific to sponges also occur in other habitats, such as seawater, sediment, and other hosts  
85 (Simister et al. 2012). Therefore, it would be preferable to refer to the associated microbial  
86 partners with the term ‘sponge-enriched’ or ‘host-enriched’ (Moitinho-Silva et al. 2014).

87

88 In the present study, we assess and compare prokaryote communities from four sponge species  
89 and the surrounding seawater collected in two South Shetland Islands and at two locations in the  
90 Antarctic Peninsula separated by ca. 670 km. We sought to answer the following questions: 1)  
91 How is the diversity and microbial community composition associated to Antarctic marine  
92 sponges, compared to the surrounding seawater? 2) Is there a core-microbiome associated to  
93 them? 3) Are these communities host-specific and consistent over a geographic scale? This is  
94 one of the first reports that used high throughput sequencing to unravel the composition and  
95 diversity of symbiotic microbial communities associated to Antarctic marine sponges.

96

## 97 **Materials and methods**

### 98 **Sample collection**

99 During the austral summer 2016, four sponge species were collected at different locations from  
100 two South Shetland Islands and the Antarctic Peninsula (Table 1). Replicate seawater samples (n  
101 = 3, 2 l samples) were aseptically collected adjacent to the sampled sponges from all locations.  
102 Sponges were processed after collection. A sample from each specimen was taken with a sterile  
103 scalpel and rinsed several times in 0.22 µm-filtered seawater to discard loose attached  
104 microorganisms. Seawater samples were passed through polycarbonate 5 µm and 0.22 µm filters  
105 (sequentially; MilliporeSigma, Burlington, MA, USA), and the contents on the 0.22 µm filters

106 were used to examine the ambient bacterioplankton communities. All samples were preserved in  
107 RNAlater until further use.

108

#### 109 **16S rRNA gene (V4) sequence clone libraries**

110 We used the sponges and seawater collected from Deception Island to generate these libraries.

111 DNA was extracted using the DNeasy PowerSoil kit (Qiagen, Germantown, MD, USA)

112 following standard protocols of the Earth Microbiome Project

113 (<http://press.igsb.anl.gov/earthmicrobiome/emp-standard-protocols/dna-extraction-protocol/>).

114 DNA was PCR amplified with the AmpliTaq Gold 360 Master Mix (Applied Biosystems) and

115 the universal bacterial/archaeal forward and reverse primers 515fb and 806rb (Caporaso et al.

116 2011; Apprill et al. 2015). Three separate reactions were conducted per each sample. The

117 thermocycler profile consisted of an initial denaturation step at 95 °C for 10 min; 31 cycles of

118 95°C for 45s, 51°C for 60s, and 72°C for 90s with a final elongation step at 72°C for 10 min.

119 Equimolar concentrations of all individuals of the same species were pooled and purified using

120 the GeneClean® Turbo Kit (MP Biomedicals). Purified PCR products (ca. 10 ng) were ligated

121 into plasmids using the pGEM®-T Easy Vector System (Promega).

122

123 Individual clones were PCR-screened using vector primers, and clones with approximately 250-

124 bp inserts were purified and sequenced at Scientific and Technological Centers, Universitat de

125 Barcelona (CCiT-UB). Bidirectional sequencing reactions were performed for all clones using

126 vector primers. Raw sequence data were processed in Geneious (v8.1.8; Drummond et al. 2010),

127 and low-quality sequencing reads were discarded. Representative clone sequences were

128 deposited in NCBI GenBank database under the accession numbers MN032619-MN032636.

129

130 To determine whether the cultured isolates were also recovered by the high-throughput  
131 sequencing techniques, we performed a local blast of the isolates against our 16S microbiome  
132 sequencing data (NCBI-BLAST-2.7.1+).

133

### 134 **Microbiome analysis**

135 DNA extracts were submitted to Molecular Research LP ([www.mrdnalab.com](http://www.mrdnalab.com), Shallowater, TX,  
136 USA) for amplification, library construction and multiplexed sequencing of partial (V4) 16S  
137 rRNA gene sequences on an Illumina MiSeq platform. The HotStarTaq Plus Master Mix kit  
138 (Qiagen) was used for PCR amplifications using DNA extracts as templates with universal  
139 bacterial/archaeal forward and reverse primers 515fb and 806rb (See Cloning). To barcode  
140 samples, a multiplex identifier barcode was attached to the forward primer. The thermocycler  
141 profile consisted of an initial denaturation step at 94 °C for 3 min; 28 cycles of 94°C for 30s,  
142 53°C for 40s, and 72°C for 1 min with a final elongation step at 72°C for 5 min. Equimolar  
143 concentrations of samples were pooled and purified using Agencourt Ampure XP beads  
144 (Beckman Coulter) to prepare DNA library by following Illumina TruSeq DNA library  
145 preparation protocol. Sequencing was then performed according to manufacturer's guidelines on  
146 an Illumina MiSeq. Illumina sequence data were deposited in NCBI SRA under the accession  
147 number PRJNA548273.

148

149 As described previously (Thomas et al. 2016), Illumina sequence reads were processed in mothur  
150 v1.39.5 (Schloss et al. 2009). Briefly, raw reads were demultiplexed, forward and reverse reads  
151 were then joined, and sequences <200bp and/or with ambiguous base calls were removed.

152 Sequences were aligned to the SILVA database (release 128, non-redundant, mothur-formatted),  
153 trimmed to the V4 region, and screened for chimeras and errors. A naïve Bayesian classifier and  
154 Greengenes taxonomy (August 2013 release, mothur-formatted) was used to aid in the removal  
155 of non-target sequences (e.g., chloroplasts, mitochondria). We used the SILVA database (release  
156 132, non-redundant, mothur-formatted) for final taxonomic assignment. The resulting high-  
157 quality sequences were clustered into operational taxonomic units (OTUs) defined by clustering  
158 at 3% divergence and singletons were removed. We used rarefaction curves (mothur v1.39.5) to  
159 plot the OTUs observed as a function of sequencing depth. To avoid artifacts of varied sampling  
160 depth on subsequent diversity calculations, each sequence dataset was subsampled to the lowest  
161 read count (mothur v1.39.5). To place the determined OTUs into a greater context, these were  
162 compared to the database of the sponge EMP project (Moitinho-Silva et al. 2017a) using local  
163 BLAST searches (NCBI-BLAST-2.7.1+).

164

### 165 **Community-level analysis**

166 To compare bacterial community profiles, nonmetric multi-dimensional scaling (nMDS) plots of  
167 Bray-Curtis similarity matrices were constructed with mothur (v1.39.5) and R (version 3.4.3;  
168 ggplot2 package) from square-root transformed OTU relative abundance data. We also  
169 constructed bubble charts in R (version 3.4.3; ggplot2 package) from OTU relative abundances  
170 to plot community dissimilarities among locations. Significant differences among sponge species  
171 and ambient seawater were assessed using a one-way permutational multivariate analysis of  
172 variance (PERMANOVA), with the factor source (all sponge species vs. seawater). Significant  
173 differences among sponge species were assessed with a one-way PERMANOVA, with the factor  
174 source (*D. antarctica*, *S. antarcticus*, *M. acerata*, and *H. pilosus*). Differences between sponge



175 species and locations were assessed using a two-way PERMANOVA, with the factors source (*D.*  
176 *antarctica* and *S. antarcticus*), location (Deception Island, Rothera, Half Moon Island,  
177 O'Higgins) and an interaction term. Pairwise comparisons were subsequently conducted for all  
178 significant PERMANOVA results. Permutational multivariate analysis of dispersion  
179 (PERMDISP) was used to detect differences in homogeneity (dispersion) among groups for all  
180 significant PERMANOVA outcomes. All multivariate statistics were performed in R (version  
181 3.4.3; with `adonis2` and `betadisper` functions from `vegan` v2.5-6 package).

182  
183 We calculated three indices of alpha diversity in `mothur` v1.39.5 (Schloss et al. 2009) to evaluate  
184 community richness and evenness: observed OTU richness, the Simpson index of evenness and  
185 the inverse of Simpson index of diversity. One-way analyses of variance (ANOVA) was used to  
186 detect differences in diversity metrics among the species from Deception Island (*D. antarctica*,  
187 *S. antarcticus*, *M. acerata*, and *H. pilosus*). Two-way analysis of variance (ANOVA) was used to  
188 detect differences in diversity metrics by the factors source (*D. antarctica* and *S. antarcticus*),  
189 location (sampling sites) and an interaction term, followed by pairwise comparisons for any  
190 significant factor. All data that did not meet the statistical assumptions was transformed  
191 accordingly (log-transformation for inverse of Simpson index). The univariate statistics were  
192 performed in R (version 3.4.3; `Anova` function from `car` package).

193

#### 194 **OTU-level analysis**

195 We were interested in OTUs that were abundant (i.e., >0.1% relative abundance) and widespread  
196 among sponge host individuals (i.e., 90% prevalence), so we performed a core microbiome  
197 analysis in R (version 3.5.3, package `Microbiome`). We also analyzed the dataset for patterns in

198 relative abundances of OTUs within categories (e.g., sponge vs. seawater, among locations). For  
199 this purpose, we removed from the dataset rare OTUs (<0.1% relative abundance) and OTUs  
200 with a low incidence across samples (detected in <2 samples). We used the Mann-Whitney-U  
201 test (or Wilcoxon rank sum test) with FDR p-value correction to identify significantly different  
202 patterns in OTU relative abundance among hosts and life stages using QIIME (Caporaso et al.  
203 2010).

204

## 205 **Results**

### 206 **Microbiome composition associated to Antarctic sponges**

207 The V4 region of the 16S rRNA gene was sequenced on an Illumina MiSeq platform and a total  
208 of 4,398,237 reads were obtained after denoising and quality filtering with a library depth  
209 ranging from 39,883 to 154,480 reads. As we had 4 replicates per species and location in most of  
210 the cases, we discarded those samples (n = 5) with the lowest number of reads ( $\leq 51,407$ ) to have  
211 at least 3 replicates per sponge and site. To avoid artifacts of varied sampling depth, we rarefied  
212 our libraries to the lowest read count after removing the previous samples from the dataset (n =  
213 52,637; Suppl. Fig. S1). Twenty-eight bacterial and 3 archaeal phyla were detected in the 11,187  
214 OTUs recovered from seawater and sponge samples, which were predominantly affiliated to the  
215 phyla Proteobacteria and Bacteroidetes (Suppl. Fig S2). Of these, 4,619 OTUs were recovered  
216 from *D. antarctica*, 3,438 OTUs from *S. antarcticus*, 1,381 OTUs from *M. acerata*, and 1,490  
217 OTUs from *H. pilosus*. Seawater exhibited greater richness with 6,071 OTUs, 2,511 of which  
218 were shared with either *D. antarctica* or *S. antarcticus* or with both species, and 1,240 were  
219 shared with *M. acerata* and/or *H. pilosus* (Suppl. Fig. S3). Seawater from Rothera, and especially  
220 from Deception Island contained the lowest amounts of Gammaproteobacteria.

221  
222 The taxonomic composition of microbial communities recovered from ambient seawater, and  
223 from *S. antarcticus*, *M. acerata* and *H. pilosus* sponge hosts, were significantly different, while  
224 *D. antarctica* presented a microbial content quite similar to what we found in seawater (Fig. 1).  
225 Firstly, the microbial communities harbored by the first three species were enriched for  
226 Gammaproteobacteria (>60%, >80%, >65% of the microbial community on average,  
227 respectively) and Thaumarchaeota (>20% in *S. antarcticus* and *H. pilosus*, >8% in *M. acerata*)  
228 compared to seawater (<42% and <0.5%, respectively). Comparatively, *D. antarctica* hosted less  
229 Gammaproteobacteria (<54%) and its associated Thaumarchaeota were almost absent (<0.5%).  
230 Secondly, microbial communities in the first three sponges were depleted in members of  
231 Alphaproteobacteria (<5% in all three species) and Bacteroidetes (<8% in all three species)  
232 compared to seawater (>24% and >30%, respectively) and *D. antarctica* (>26% and >17%,  
233 respectively). The inter-individual variability of the taxonomic composition depends on the host.  
234 While *H. pilosus* and *S. antarcticus* harbored a quite stable microbial signature, *D. antarctica*  
235 exhibited greater inter-individual variability and one of the specimens of *M. acerata* showed an  
236 enrichment for Thaumarchaeota (Fig. 1).

237

### 238 **Differences within and between sponge-associated and seawater microbial communities**

239 Statistically significant differences in community structure (PERMANOVA) were detected  
240 among *S. antarcticus*, *M. acerata*, *H. pilosus* and *D. antarctica* and seawater microbes ( $F_{4,39} =$   
241 10.563;  $P = 0.001$ ). Symbiont communities from seawater sources exhibited no overlap with  
242 sponge species in the multidimensional space, and all sponge species occupied distinct regions of  
243 the nMDS plot (Fig. 2). In addition, a significant interaction between host species (*S. antarcticus*

244 and *D. antarctica*) and location occurred (PERMANOVA,  $F_{3,18} = 2.422$ ;  $P = 0.008$ ), though we  
245 could not detect significant pairwise differences in community structure after p-value correction.  
246 Dispersion analysis revealed equal variability within *S. antarcticus* and *D. antarctica* microbial  
247 communities regardless of location ( $P > 0.05$  in all comparisons), but microbiomes of the latter  
248 species from O'Higgins were more variable ( $P = 0.046$ ; Fig. 2).

249  
250 Larger mean values of richness, diversity (i.e., inverse Simpson diversity index), and evenness in  
251 symbiont communities from seawater compared to host species were observed ( $P < 0.001$  in all  
252 pairwise comparisons; Table 2). When we analyzed the sponges from Deception Island, the  
253 microbiome of all the species seemed to be equally richer and diverse with similar evenness  
254 except for the comparison between *H. pilosus* and *M. acerata*, where the former species  
255 presented more OTU richness ( $P = 0.048$ ). Comparing *D. antarctica* and *S. antarcticus* from the  
256 four locations studied, a two-way ANOVA detected significant differences between hosts and  
257 locations for species richness, diversity and evenness ( $P < 0.03$  in all cases). *D. antarctica*  
258 harbored a richer microbiome but less diverse than *S. antarcticus*. Additionally, the sponge  
259 microbial communities from Half-moon Island had greater species richness and diversity  
260 compared to those from Rothera (pairwise comparisons  $P < 0.05$ ). Although there was an effect  
261 of location on the microbiome evenness, differences among pairs were not detected.

262  
263 The abundance of shared OTUs ( $n = 2,893$ ) between sponge-associated and seawater microbial  
264 communities was calculated and just 2.2% presented relative abundances over 0.1%. Those few  
265 OTUs ( $n = 65$ ) accounted for 93% and 89% of the total relative abundance of sponge-associated

266 and seawater microbial communities, respectively, which meant that sponge-specific OTUs  
267 (64%) fell within the ‘rare biosphere’ (<0.1% relative abundance).

268

### 269 **Core and variable microbiome in Antarctic sponges**

270 In addition to community-level metrics of diversity and structure, we performed a core  
271 microbiome analysis to investigate patterns in abundant and prevalent individual OTUs among  
272 sponge hosts. The strict core microbiome (i.e., with relative abundances >0.1% and present in all  
273 species) of the sponge hosts was formed by 7 OTUs accounting for 50% of total relative  
274 abundance on average (0.1% of total OTUs present in sponge hosts, 4.2% of OTUs with relative  
275 abundance >0.1% in at least one sample; Suppl. Table S1). Significant sponge enrichments in 4  
276 core OTUs, affiliated to Gammaproteobacteria, were detected with a mean fold-change in  
277 abundance of  $44.9 \pm 8.0$  ( $\pm$  SE) with respect to seawater (mean relative abundance 0.28%). Three  
278 additional sponge core OTUs, which were affiliated to the groups Alphaproteobacteria,  
279 Bacteroidetes, and Gammaproteobacteria, were more abundant in seawater communities (fold-  
280 change  $14.3 \pm 4.5$ ; Suppl. Table S2). We also determined the variable community (i.e., with  
281 relative abundances >0.1% and present in at least two species) formed by 56 OTUs that  
282 represented on average 39% of the total abundance (0.7% of total OTUs present in sponges,  
283 33.3% of OTUs with a relative abundance >0.1% in at least one sample; Suppl. Table S1). Forty-  
284 three sponge variable OTUs that had a mean fold-change in abundance of  $49.5 \pm 8.2$  were  
285 extremely rare in seawater (mean relative abundance <0.03%). Thirteen additional sponge  
286 variable OTUs were enriched in seawater with mean relative abundance >2.7% (fold-change  
287  $13.7 \pm 2.6$ ). We comparatively determined the core microbiome of *D. antarctica* and *S.*  
288 *antarcticus*. Both species harbored 10 major OTUs (6 out of 7 sponge core OTUs and 4 variable

289 OTUs) representing over 70% of the microbiome relative abundance (Suppl. Table S1). Seawater  
290 presented instead a core microbiome of 18 OTUs (including 6 sponge core OTUs) accounting for  
291 over 60% of the microbiome in relative abundance (Suppl. Table S1). Comparing the sponge  
292 species analyzed, 4 core and 17 variable OTUs seemed to be sponge-enriched for either *D.*  
293 *antarctica* (OTUs 1, 4, 9, 11, 13, 27, 33 and 45; cumulative 84% relative abundance; Fig. 3), *S.*  
294 *antarcticus* (OTUs 2, 7, 23, 31, 43, 51 and 56; 54% relative abundance; Fig. 3), *M. acerata*  
295 (OTU 6; 65% relative abundance) or *H. pilosus* (OTUs 3, 14, 19, 34 and 53; 71% relative  
296 abundance), although they were also detected in the other hosts and in seawater in lower  
297 frequencies (Suppl. Table S2). If we compared locations, neither *D. antarctica* nor *S. antarcticus*  
298 presented differences in their microbiome abundances among sampling sites (Fig. 3; Suppl.  
299 Table S2). However, OTU 2 decreased its relative abundance to 0.3% in *S. antarcticus* at Half  
300 Moon Island, whereas the proportion was over 40% on average for the rest of locations (Fig. 3).  
301  
302 From the 8,009 OTUs present in the sponges analyzed, 56.1% could be described as host-  
303 specific (i.e., present only in one sponge species), ranging from 254 OTUs in *M. acerata* to 2,230  
304 OTUs in *D. antarctica*. However, all of these OTUs belonged to the rare biosphere associated to  
305 the sponge host with mean relative abundance below 0.1%. Although OTUs from core and  
306 variable microbial communities were detected in all the sponge species analyzed, and even in  
307 ambient seawater, the specificity for one of the hosts of some variable OTUs (38%) could be  
308 considered due to the low number of reads recovered from the other habitats (<0.02% relative  
309 abundance).

310

311 **Comparing Antarctic sponge associated microbial communities with the sponge EMP**  
312 **database and clone libraries from the present study.**

313 Local BLAST searches against the sponge EMP database showed that 87% of the OTUs (n =  
314 9,782) were found among the sponge microbiome collection at high sequence similarities (Suppl.  
315 File S1). Both core and variable communities associated to Antarctic sponges had a closest  
316 relative in the sponge microbiome database with sequence identities over 97%. Only 3 variable  
317 OTUs had similarities between 93-96%. The core microbiome associated to the Antarctic  
318 sponges is also associated to other sponge hosts and habitats (Suppl. File S1).

319  
320 From the clone library analysis, the V4 region of the 16S rRNA gene sequenced on a Sanger  
321 platform yielded a total of 112 sequences after denoising and quality filtering. Each library,  
322 composed by all replicates from either one sponge host or seawater, ranged from 6 to 33  
323 sequences. All these sequences were classified into 18 clone OTUs, mostly unique in the sources  
324 analyzed (Suppl. Fig. S4). Local BLAST searches against the 16S microbiome data from this  
325 study showed that 100% of the clone OTUs were found among our microbiome collection with  
326 sequence identities over 98% (Suppl. File S2). We could recover 6 OTUs assigned to the core  
327 microbiome (>0.1% relative abundance and 90% prevalence) and 8 variable OTUs (>0.1%  
328 relative abundance and 10-90% prevalence) from sponge hosts, accounting for over 60% of the  
329 total microbiome relative abundance.

330

331 **Discussion**

332 This work describes the bacterial and archaeal diversity and the community composition of four  
333 Antarctic sponge species, revealing that the sponges had a microbial signature different from the

334 richer and diverse seawater community. In Antarctica, due to the difficult access to this region,  
335 only few studies have made comprehensive descriptions of microbial symbionts of marine  
336 sponges (Webster et al. 2004; Rodríguez-Marconi et al. 2015; Cárdenas et al. 2018; Steinert et al.  
337 2019; Cárdenas et al. 2019; Moreno-Pino et al. 2020). However, this is the first study that  
338 assesses the microbial communities associated to Antarctic sponges using high throughput  
339 sequencing, considering biological replications and covering a spatial scale over 650 km.

340

341 **Diversity and taxonomic composition of microbial communities associated to Antarctic**  
342 **sponges**

343 Although there is a lot of diversity to be uncovered, we have captured all abundant microbes  
344 present in Antarctic sponges and seawater (Suppl. Fig. S1). The sponge associated  
345 Bacteria/Archaea communities were less diverse than surrounding seawater as previously  
346 reported for other Antarctic sponge hosts, reinforcing the view that these sponges were  
347 composed of low microbial abundance (LMA) microbiomes (Moitinho-Silva et al. 2017b).  
348 Although Antarctic sponges displayed less diversity than the surrounding seawater, two more  
349 phyla were detected in sponges (Suppl. Fig. S5 & S6). If we discard phyla with low sequence  
350 abundances (i.e., <0.1% abundance), sponges and seawater harbored 5 bacterial and 1 archaeal  
351 phyla. Both biotopes presented Thaumarchaeota as the predominant archaeal phylum, which  
352 accumulated 10.8% of the reads in sponges while just 0.1% in seawater. With regard to bacteria,  
353 differences lay in the fact that sponges hosted bacteria of Nitrospirae and Nitrospinae phyla,  
354 while seawater had instead representatives of Cyanobacteria and Verrucomicrobia. However, all  
355 these phyla accumulated microbial abundances ranging from 0.1 to 1.4%.

356



357 Classes Gamma- and Alphaproteobacteria dominate bacterial assemblages in association with  
358 marine sponges from different biotopes (Thomas et al. 2016; Moitinho-Silva et al. 2017a; Pita et  
359 al. 2018; Cleary et al. 2019). These classes also dominate Antarctic sponges as previously  
360 reported on Antarctic marine shallow (Webster et al. 2004; Rodríguez-Marconi et al. 2015;  
361 Cárdenas et al. 2018; Cárdenas et al. 2019) and deep waters (Steinert et al. 2019) with  
362 Bacteroidetes also as important members in terms of number of OTUs recovered ( $n = 1,174$ ) and  
363 in relative abundance (10%). The presence of the phylum Nitrospirae (>3% in relative  
364 abundance) in one of the sponges analyzed (*S. antarcticus*) is particularly noticeable. Members  
365 of this phylum are potentially involved in nitrification processes, specifically in nitrite oxidation  
366 (Radax et al. 2012). A previous study provided a preliminary description of the bacterial  
367 communities present in Deception Island waters, which were very different than the usual  
368 Antarctic microbial diversity (Angulo-Preckler et al. 2015). We found that Bacteroidetes  
369 dominated the seawater microbial community, probably influenced by the special conditions of  
370 this island, an active volcano with high concentrations of geothermal elements. This suggested a  
371 correlation between the environmental microbial diversity and the geochemical composition of  
372 the island. However, the sponges studied from the same area contained a different microbial  
373 signature than the environment.

374

375 The phylum Chloroflexi, and other bacterial phyla such as Actinobacteria or Acidobacteria, have  
376 been frequently found in high microbial abundance (HMA) sponges (Schmitt et al. 2011;  
377 Moitinho-Silva et al. 2017b), occasionally reaching high percentages in relative abundances (5-  
378 10%). Contrastingly, these phyla represent a much lower percentage in Antarctic sponges  
379 (0.0005-0.4%). Our results are in agreement with previous studies carried out in Antarctica

380 (Rodríguez-Marconi et al. 2015; Cárdenas et al. 2018; Steinert et al. 2019; Moreno-Pino et al.  
381 2020). Other widely described but less abundant phyla associated with sponges from other  
382 geographical areas are Poribacteria and PAUC34f (Moitinho-Silva et al. 2017b). These bacterial  
383 groups were not detected neither in the Antarctic sponges from the present study nor in other  
384 species previously studied in Antarctica (Rodríguez-Marconi et al. 2015; Cárdenas et al. 2018;  
385 Steinert et al. 2019; Cárdenas et al. 2019; Moreno-Pino et al. 2020). These phyla have been  
386 found overrepresented in HMA over LMA sponges and can be used as “HMA/LMA indicators”  
387 (Moitinho-Silva et al. 2017b; Glasl et al. 2018). This suggests that the microbial community  
388 structure of the sponges from the present study resemble that from LMA sponges.

389

390 Besides Bacteria, the presence of Archaea associated to marine sponges from tropical to cold  
391 waters has been previously documented (Radax et al. 2012; Jackson et al. 2013; Cardoso et al.  
392 2013; Kennedy et al. 2014; Polónia et al. 2014; Turon and Uriz 2020). These archaeal  
393 communities were dominated by the phylum Thaumarchaeota, which can reach high relative  
394 abundances in the sponge prokaryotic community. Three of the species analyzed in this study (*S.*  
395 *antarcticus*, *M. acerata*, *H. pilosus*) harbored abundant populations of an OTU (~10-25%)  
396 affiliated to *Candidatus Nitrosopumilus*. In Antarctica, the presence of Thaumarchaeota-related  
397 sequences has been reported in multiple species (Steinert et al. 2019; Moreno-Pino et al. 2020),  
398 including *M. acerata* (Webster et al. 2004; Rodríguez-Marconi et al. 2015). These taxa act as  
399 ammonia oxidizers not only in tropical reefs but also in cold environments (Radax et al. 2012;  
400 Cardoso et al. 2013; Polónia et al. 2015). Indeed, the genomic potential for ammonia oxidation  
401 was recently evidenced for *Leucetta antarctica* microbiome from Antarctica (Moreno-Pino et al.  
402 2020). Together with the potential nitrite oxidizers detected (members of Nitrospirae), they may

403 be considered as relevant factors in nitrogen cycling in Antarctica. However, further studies are  
404 needed to understand the functional roles these microorganisms play in Antarctic symbiosis and  
405 their contribution to the ecosystem.

406

407 **Core, variable and species-specific microbiome in Antarctic sponges compared to seawater**  
408 **communities**

409 A minimal core microbial community (0.1%) was found in Antarctic sponges consisting of very  
410 few OTUs ( $n = 7$ ) present in all four species but also in ambient seawater. The core prokaryotic  
411 community of sponges is rather small, pattern that has been documented from different  
412 biogeographic regions, including Antarctica (Schmitt et al. 2012; Easson and Thacker 2014;  
413 Rodríguez-Marconi et al. 2015). We also defined a small variable community (0.7%) that  
414 consisted of 56 OTUs hosted in at least two of the sponge species analyzed with relative  
415 abundances above 0.1%. Nevertheless, 43% of these variable taxa had such low abundances  
416 ( $<0.001\%$  on average) in three of the species that they could be considered as species-specific  
417 OTUs. The concept of ‘sponge or host specificity’ needs to be revised as molecular techniques  
418 now allow deep sequencing of associated microbial assemblages. A taxon we thought unique of  
419 a particular biotope (e.g., sponges, a particular host), we are able now to detect it in other habitats  
420 but at much lower numbers. Thus, the term ‘sponge- or host-enriched’ has been introduced  
421 (Moitinho-Silva et al. 2014). In this regard, *D. antarctica* and *M. acerata* presented an  
422 enrichment of one of the core OTUs and *S. antarcticus* was enriched with other two core taxa  
423 representing a 45-fold change compared to seawater. The additional three sponge core OTUs  
424 were enriched in planktonic communities (Suppl. Table S2). The same enrichment pattern was

425 found in 30% of the variable OTUs (Suppl. Table S2), which were categorized as rare (0.06% on  
426 average) in the surrounding seawater representing a 50-fold increase.

427

428 The fact that predominant OTUs were detected in all sponges from different geographic  
429 locations and also in the surrounding seawater suggests a global distribution of these microbes  
430 through the Antarctic environment. These OTUs might be adapted to their particular niches  
431 representing different ecotypes of the same microorganisms, so it is possible that they are  
432 horizontally transmitted through strong selective mechanisms (Schmitt et al. 2012; Turon et al.  
433 2018). The majority of the sponge prokaryotic community (99%) belonged to the ‘rare  
434 biosphere’ with mean relative abundances below 0.1%, and over 50% could be described as host-  
435 specific taxa. The specificity of host-microbe associations seems to extend beyond some  
436 dominant taxa from the variable community into the rare biosphere (Reveillaud et al. 2014).

437

438 Beyond the existence of certain plasticity of microbiomes within a particular host, the dominance  
439 of a gammaproteobacterial OTU (Betaproteobacteriales) in *M. acerata* was also recently reported  
440 from another location of the Antarctic Peninsula (Cárdenas et al. 2019). This spatial stability was  
441 also documented in the present study for dominant OTUs in *D. antarctica* and *S. antarcticus*  
442 across a geographic scale <700 km. These results are in agreement with a recent study in the  
443 Caribbean that found little variations in the sponge microbiome of *Cliona delitrix* over small  
444 geographic scales (<300 km), while a considerable geographic distance impact over a large  
445 regional scale (>1,000 km) was reported (Easson et al. 2020). To date, published data support the  
446 combination of host identity, geography, and environment as the main forces determining the  
447 structure of sponge microbiomes (Webster et al. 2010; Schmitt et al. 2012; Easson et al. 2020).

448 In Antarctica in particular, the microbial signature of sponges might be also related to a  
449 biogeographic partitioning of Southern Ocean microorganisms caused by the Polar Front, such as  
450 the deficit of Cyanobacteria in Antarctica (Wilkins et al. 2013), as evidenced in the present and  
451 previous studies (Rodríguez-Marconi et al. 2015; Cárdenas et al. 2018; Moreno-Pino et al. 2020).  
452 Since most collection efforts of sponges have so far explored tropical and temperate  
453 environments, this study contributes to expand our knowledge on sponge microbiome structure  
454 in polar waters.

455

#### 456 **Comparison of Antarctic sponge microbiomes with clone libraries and sponge EMP** 457 **database**

458 We have demonstrated with this study that we can recover sponge core OTUs cloning the 16S  
459 rRNA gene sequence. However, if a more comprehensive and thorough analysis of the host-  
460 associated microbial assemblages is needed, high throughput sequencing techniques are required.  
461 The fact that nearly 90% of the Antarctic sponge microbiomes had a blast hit with a sequence  
462 similarity over 97% against the sponge EMP collection would represent the ubiquity of the  
463 sponge-associated microbes through species and habitats.

464

#### 465 **Conclusion**

466 Antarctic sponge-associated microbial communities displayed less diversity than their  
467 surrounding seawater counterparts conferring them the status of LMA sponges. Their microbial  
468 composition and structure with one or two dominant OTUs also resembled that from LMA  
469 sponges. Some abundant microbes have been related to the nitrification process and may play a  
470 central role in the nitrogen cycling in Antarctica. A global distribution of sponge-associated

471 microbes has been documented; however, symbiont communities exhibit little uniformity in  
472 species composition or structure (Thomas et al. 2016). Antarctic sponges seem to follow the  
473 same pattern of symbiotic community organization. The core microbiomes are characterized by  
474 generalists microbes with little representation of specialists, a pattern previously described as  
475 ‘specific mix of generalists’ (Erwin et al. 2012a). Different sponge species likely represent  
476 different ecological niches for prokaryotes, each with a specific microbial community that is  
477 vertically and horizontally acquired and selectively maintained (Webster et al. 2010; Sacristán-  
478 Soriano et al. 2019). Host identity seems to be the strongest driving force in determining the  
479 composition of sponge symbiont assemblages. However, associated microbial communities  
480 could be slightly influenced by biogeography and environmental factors defining a microbial  
481 signature for a particular habitat (Kennedy et al. 2014; Rodríguez-Marconi et al. 2015; Easson et  
482 al. 2020). In future studies, the use of metagenomics (Moreno-Pino et al. 2020) and  
483 metatranscriptomics will allow the recovery of functional genes and improve our understanding  
484 of the physiological roles of Antarctic sponge-associated microbiota.

485

## 486 **Acknowledgements**

487 We would like to thank BIO-Hesperides and BAE Gabriel de Castilla crews for their logistic  
488 support during the XXI Spanish Antarctic Survey. Thanks are also due to C. Leiva, P. Álvarez-  
489 Campos, G. Giribet, J. Junoy, B. Figuerola, J. Moles, C. Angulo-Preckler, and L. Cardona, for  
490 their help with sample collection. Special thanks to F.J. Cristobo for his valuable help in sample  
491 collection and taxonomic identifications. This work was funded by grants from the Spanish  
492 Government: DISTANTCOM (CTM2013- 42667/ANT), BLUEBIO (CTM2016-78901/ANT),  
493 and PopCOmics project (CTM2017-88080; MCIU,AEI/FEDER, UE), as well as the European

494 Union's Horizon 2020 research and innovation program under the Marie Skłodowska-Curie  
495 grant agreement 705464 ("SCOOPA") to OSS. This is an AntECO (SCAR) contribution.

496

497

498

499

500

501

502

503

504

505

## 506 **References**

- 507 Angulo-Preckler C, Cid C, Oliva F, Avila C (2015) Antifouling activity in some benthic  
508 Antarctic invertebrates by *in situ* experiments at Deception Island, Antarctica. *Mar Environ*  
509 *Res* 105:30–8.
- 510 Angulo-Preckler C, Figuerola B, Núñez-Pons L, Moles J, Martín-Martín R, Rull-Lluch J,  
511 Gómez-Garreta A, Avila C (2018) Macrobenthic patterns at the shallow marine waters in  
512 the caldera of the active volcano of Deception Island, Antarctica. *Cont Shelf Res* 157:20–  
513 31.
- 514 Apprill A, McNally S, Parsons R, Weber L (2015) Minor revision to V4 region SSU rRNA 806R  
515 gene primer greatly increases detection of SAR11 bacterioplankton. *Aquat Microb Ecol*  
516 75:129–137.
- 517 Bavestrello G, Arillo A, Calcinai B, Cattaneo-Vietti R, Cerrano C, Gaino E, Penna A, Sara M  
518 (2000) Parasitic diatoms inside antarctic sponges. *Biol Bull* 198:29–33.
- 519 Bell JJ (2008) The functional roles of marine sponges. *Estuar Coast Shelf Sci* 79:341–353.
- 520 Caporaso JG, Kuczynski J, Stombaugh J, Bittinger K, Bushman FD, Costello EK, Fierer N, Peña  
521 AG, Goodrich JK, Gordon JI, et al (2010) QIIME allows analysis of high-throughput  
522 community sequencing data. *Nat Methods* 7:335–336.
- 523 Caporaso JG, Lauber CL, Walters WA, Berg-Lyons D, Lozupone CA, Turnbaugh PJ, Fierer N,  
524 Knight R (2011) Global patterns of 16S rRNA diversity at a depth of millions of sequences  
525 per sample. *Proc Natl Acad Sci* 108:4516–4522.
- 526 Cárdenas CA, Font A, Steinert G, Rondon R, González-Aravena M (2019) Temporal Stability of  
527 Bacterial Communities in Antarctic Sponges. *Front Microbiol* 10:1–14.
- 528 Cárdenas CA, González-Aravena M, Font A, Hestetun JT, Hajdu E, Trefault N, Malmberg M,  
529 Bongcam-Rudloff E (2018) High similarity in the microbiota of cold-water sponges of the  
530 Genus *Mycale* from two different geographical areas. *PeerJ* 6:e4935.
- 531 Cardoso J, van Bleijswijk J, Witte H, van Duyl F (2013) Diversity and abundance of ammonia-  
532 oxidizing Archaea and Bacteria in tropical and cold-water coral reef sponges. *Aquat Microb*  
533 *Ecol* 68:215–230.
- 534 Cerrano C, Arillo A, Bavestrello G, Calcinai B, Cattaneo-Vietti R, Penna A, Sarà M, Totti C  
535 (2000) Diatom invasion in the antarctic hexactinellid sponge *Scolymastra joubini*. *Polar*  
536 *Biol* 23:441–444.



- 537 Cerrano C, Calcinai B, Cucchiari E, Camillo C Di, Nigro M, Regoli F, Sarà A, Schiaparelli S,  
538 Totti C, Bavestrello G (2004) Are diatoms a food source for Antarctic sponges? *Chem Ecol*  
539 20:57–64.
- 540 Cleary DFR, Swierts T, Coelho FJRC, Polónia ARM, Huang YM, Ferreira MRS, Putchakarn S,  
541 Carvalheiro L, van der Ent E, Ueng J, et al (2019) The sponge microbiome within the  
542 greater coral reef microbial metacommunity. *Nat Commun* 10:1644.
- 543 Drummond AJ, Ashton B, Buxton S, Cheung M, Cooper A, Duran C, Field M, Heled J KM&  
544 MS et al. (2010) G v5. 3. A at: <http://www.geneious.co>. (2010) Geneious v5.3. Available  
545 at: <http://www.geneious.com>.
- 546 Easson CG, Chaves-Fonnegra A, Thacker RW, Lopez J V. (2020) Host population genetics and  
547 biogeography structure the microbiome of the sponge *Cliona delitrix*. *Ecol Evol* ece3.6033.
- 548 Easson CG, Thacker RW (2014) Phylogenetic signal in the community structure of host-specific  
549 microbiomes of tropical marine sponges. *Front Microbiol*. doi: 10.3389/fmicb.2014.00532
- 550 Erwin PM, López-Legentil S, González-Pech R, Turon X (2012a) A specific mix of generalists:  
551 Bacterial symbionts in Mediterranean *Ircinia* spp. *FEMS Microbiol Ecol* 79:619–637.
- 552 Erwin PM, Pita L, López-Legentil S, Turon X (2012b) Stability of sponge-associated bacteria  
553 over large seasonal shifts in temperature and irradiance. *Appl Environ Microbiol* 78:7358–  
554 7368.
- 555 Glasl B, Smith CE, Bourne DG, Webster NS (2018) Exploring the diversity-stability paradigm  
556 using sponge microbial communities. *Sci Rep* 8:8425.
- 557 Henríquez M, Vergara K, Norambuena J, Beiza A, Maza F, Ubilla P, Araya I, Chávez R, San-  
558 Martín A, Darias J, et al (2014) Diversity of cultivable fungi associated with Antarctic  
559 marine sponges and screening for their antimicrobial, antitumoral and antioxidant potential.  
560 *World J Microbiol Biotechnol* 30:65–76.
- 561 Hentschel U, Hopke J, Horn M, Anja B, Wagner M, Hacker J, Bradley S, Friedrich AB, Moore  
562 BS (2002) Molecular evidence for a uniform microbial community in sponges from  
563 different oceans. *Appl Environ Microbiol* 68:4431–4440.
- 564 Hill MS, Sacristán-Soriano O (2017) Molecular and functional ecology of sponges and their  
565 microbial symbionts. In: *Climate Change, Ocean Acidification and Sponges*. Springer  
566 International Publishing, Cham, pp 105–142
- 567 Hooper JN a., Van Soest RWM (2004) Book Review: *Systema Porifera*. Guide to the

- 568 classification of sponges. *Invertebr Syst* 18:233–234.
- 569 Jackson S a., Flemer B, McCann A, Kennedy J, Morrissey JP, O’Gara F, Dobson ADW (2013)
- 570 Archaea appear to dominate the microbiome of *Inflatella pellicula* deep sea sponges. *PLoS*
- 571 *One* 8:1–8.
- 572 Kennedy J, Flemer B, Jackson S a., Morrissey JP, O’Gara F, Dobson ADW (2014) Evidence of a
- 573 putative deep sea specific microbiome in marine sponges. *PLoS One*. doi:
- 574 10.1371/journal.pone.0091092
- 575 Lee OO, Wang Y, Yang J, Lafi FF, Al-Suwailem A, Qian P-Y (2011) Pyrosequencing reveals
- 576 highly diverse and species-specific microbial communities in sponges from the Red Sea.
- 577 *ISME J* 5:650–664.
- 578 Lo Giudice A, Azzaro M, Schiaparelli S (2019) Microbial Symbionts of Antarctic Marine
- 579 Benthic Invertebrates. In: *The Ecological Role of Micro-organisms in the Antarctic*
- 580 *Environment*. pp 277–296
- 581 McClintock JB, Amsler CD, Baker BJ, van Soest RWM (2005) Ecology of Antarctic marine
- 582 sponges: An overview. *Integr Comp Biol* 45:359–368.
- 583 Moitinho-Silva L, Bayer K, Cannistraci C V., Giles EC, Ryu T, Seridi L, Ravasi T, Hentschel U
- 584 (2014) Specificity and transcriptional activity of microbiota associated with low and high
- 585 microbial abundance sponges from the Red Sea. *Mol Ecol* 23:1348–1363.
- 586 Moitinho-Silva L, Nielsen S, Amir A, Gonzalez A, Ackermann GL, Cerrano C, Astudillo-Garcia
- 587 C, Easson C, Sipkema D, Liu F, et al (2017a) The sponge microbiome project. *Gigascience*
- 588 6:1–7.
- 589 Moitinho-Silva L, Steinert G, Nielsen S, Hardoim CCP, Wu YC, McCormack GP, López-
- 590 Legentil S, Marchant R, Webster N, Thomas T, et al (2017b) Predicting the HMA-LMA
- 591 status in marine sponges by machine learning. *Front Microbiol* 8:1–14.
- 592 Moreno-Pino M, Cristi A, Gillooly JF, Trefault N (2020) Characterizing the microbiomes of
- 593 Antarctic sponges: a functional metagenomic approach. *Sci Rep* 10:645.
- 594 Pita L, Erwin PM, Turon X, López-Legentil S (2013) Till death do us part: Stable sponge-
- 595 bacteria associations under thermal and food shortage stresses. *PLoS One*. doi:
- 596 10.1371/journal.pone.0080307
- 597 Pita L, Rix L, Slaby BM, Franke A, Hentschel U (2018) The sponge holobiont in a changing
- 598 ocean: from microbes to ecosystems. *Microbiome* 6:46.

- 599 Polónia ARM, Cleary DFR, Duarte LN, de Voogd NJ, Gomes NCM (2014) Composition of  
600 Archaea in Seawater, Sediment, and Sponges in the Kepulauan Seribu Reef System,  
601 Indonesia. *Microb Ecol* 67:553–567.
- 602 Polónia ARM, Cleary DFR, Freitas R, de Voogd NJ, Gomes NCM (2015) The putative  
603 functional ecology and distribution of archaeal communities in sponges, sediment and  
604 seawater in a coral reef environment. *Mol Ecol* 24:409–423.
- 605 Radax R, Hoffmann F, Rapp HT, Leininger S, Schleper C (2012) Ammonia-oxidizing archaea as  
606 main drivers of nitrification in cold-water sponges. *Environ Microbiol* 14:909–923.
- 607 Reveillaud J, Maignien L, Eren M a, Huber J a, Apprill A, Sogin ML, Vanreusel A (2014) Host-  
608 specificity among abundant and rare taxa in the sponge microbiome. *ISME J* 8:1198–209.
- 609 Rodríguez-Marconi S, De la Iglesia R, Díez B, Fonseca CA, Hajdu E, Trefault N (2015)  
610 Characterization of Bacterial, Archaeal and Eukaryote Symbionts from Antarctic Sponges  
611 Reveals a High Diversity at a Three-Domain Level and a Particular Signature for This  
612 Ecosystem. *PLoS One* 10:e0138837.
- 613 Sacristán-Soriano O, Winkler M, Erwin P, Weisz J, Harriott O, Heussler G, Bauer E, West  
614 Marsden B, Hill A, Hill M (2019) Ontogeny of symbiont community structure in two  
615 carotenoid-rich, viviparous marine sponges: comparison of microbiomes and analysis of  
616 culturable pigmented heterotrophic bacteria. *Environ Microbiol Rep* 11:249–261.
- 617 Schloss PD, Westcott SL, Ryabin T, Hall JR, Hartmann M, Hollister EB, Lesniewski RA,  
618 Oakley BB, Parks DH, Robinson CJ, et al (2009) Introducing mothur: Open-Source,  
619 Platform-Independent, Community-Supported Software for Describing and Comparing  
620 Microbial Communities. *Appl Environ Microbiol* 75:7537–7541.
- 621 Schmitt S, Deines P, Behnam F, Wagner M, Taylor MW (2011) Chloroflexi bacteria are more  
622 diverse, abundant, and similar in high than in low microbial abundance sponges. *FEMS*  
623 *Microbiol Ecol* 78:497–510.
- 624 Schmitt S, Tsai P, Bell J, Fromont J, Ilan M, Lindquist N, Perez T, Rodrigo A, Schupp PJ,  
625 Vacelet J, et al (2012) Assessing the complex sponge microbiota: core, variable and  
626 species-specific bacterial communities in marine sponges. *ISME J* 6:564–576.
- 627 Simister RL, Deines P, Botté ES, Webster NS, Taylor MW (2012) Sponge-specific clusters  
628 revisited: A comprehensive phylogeny of sponge-associated microorganisms. *Environ*  
629 *Microbiol* 14:517–524.

630 Steinert G, Wemheuer B, Janussen D, Erpenbeck D, Daniel R, Simon M, Brinkhoff T, Schupp PJ  
631 (2019) Prokaryotic Diversity and Community Patterns in Antarctic Continental Shelf  
632 Sponges. *Front Mar Sci* 6:1–15.

633 Taylor MW, Radax R, Steger D, Wagner M (2007) Sponge-associated microorganisms:  
634 evolution, ecology, and biotechnological potential. *Microbiol Mol Biol Rev* 71:295–347.

635 Thomas T, Moitinho-Silva L, Lurgi M, Björk JR, Easson C, Astudillo-García C, Olson JB,  
636 Erwin PM, López-Legentil S, Luter H, et al (2016) Diversity, structure and convergent  
637 evolution of the global sponge microbiome. *Nat Commun* 7:11870.

638 Turon M, Cáliz J, Garate L, Casamayor EO, Uriz MJ (2018) Showcasing the role of seawater in  
639 bacteria recruitment and microbiome stability in sponges. *Sci Rep* 8:15201.

640 Turon M, Uriz MJ (2020) New Insights Into the Archaeal Consortium of Tropical Sponges.  
641 *Front Mar Sci* 6:1–13.

642 Webster NS, Negri AP, Munro MMHG, Battershill CN (2004) Diverse microbial communities  
643 inhabit Antarctic sponges. *Environ Microbiol* 6:288–300.

644 Webster NS, Taylor MW (2012) Marine sponges and their microbial symbionts: Love and other  
645 relationships. *Environ Microbiol* 14:335–346.

646 Webster NS, Taylor MW, Behnam F, Lückner S, Rattei T, Whalan S, Horn M, Wagner M (2010)  
647 Deep sequencing reveals exceptional diversity and modes of transmission for bacterial  
648 sponge symbionts. *Environ Microbiol* 12:2070–2082.

649 Wilkins D, Lauro FM, Williams TJ, Demaere MZ, Brown M V., Hoffman JM, Andrews-  
650 Pfannkoch C, Mcquaid JB, Riddle MJ, Rintoul SR, et al (2013) Biogeographic partitioning  
651 of Southern Ocean microorganisms revealed by metagenomics. *Environ Microbiol*  
652 15:1318–1333.

653

654

655 **Tables and figures**

656 Table 1. Samples of healthy specimens of *Dendrilla antarctica* (Topsent, 1905), *Sphaerotylus*  
657 *antarcticus* (Kirkpatrick, 1907), *Mycale (Oxymycale) acerata* (Kirkpatrick, 1907), and  
658 *Hemigellius pilosus* (Kirkpatrick, 1907) collected at 15 to 20 m depth from two South Shetland  
659 Islands (Deception and Half Moon Islands) and the Antarctic Peninsula (Rothera and O’Higgins  
660 Research Stations).

| Host species                      | Individuals<br>(N) | Location                               | Coordinates            |
|-----------------------------------|--------------------|----------------------------------------|------------------------|
| <i>Dendrilla antarctica</i>       | 4                  | Whalers Bay, Deception Island          | -62.984002, -60.562240 |
| <i>Dendrilla antarctica</i>       | 4                  | Rothera Research Station               | -67.565397, -68.118247 |
| <i>Dendrilla antarctica</i>       | 4                  | Bernardo O’Higgins Research<br>Station | -63.320612, -57.905138 |
| <i>Dendrilla antarctica</i>       | 4                  | Half Moon Island                       | -62.593079, -59.906964 |
| <i>Sphaerotylus antarcticus</i>   | 4                  | Whalers Bay, Deception Island          | -62.984002, -60.562240 |
| <i>Sphaerotylus antarcticus</i>   | 4                  | Rothera Research Station               | -67.565397, -68.118247 |
| <i>Sphaerotylus antarcticus</i>   | 2                  | Bernardo O’Higgins Research<br>Station | -63.320612, -57.905138 |
| <i>Sphaerotylus antarcticus</i>   | 3                  | Half Moon Island                       | -62.593079, -59.906964 |
| <i>Mycale (Oxymycale) acerata</i> | 4                  | Whalers Bay, Deception Island          | -62.984002, -60.562240 |
| <i>Hemigellius pilosus</i>        | 4                  | Whalers Bay, Deception Island          | -62.984002, -60.562240 |

661

662

663

664

665

666 Table 2. Diversity estimators for microbial communities associated with seawater, *Dendrilla*  
 667 *antarctica*, *Sphaerotylus antarcticus*, *Mycale acerata* and *Hemigellius pilosus* from O’Higgins  
 668 (OH), Half Moon Island (HM), Deception Island (DI) and Rothera (RO). All values represent  
 669 means ( $\pm$ SE).

| Source                | OTU richness  | Inverse Simpson’s diversity | Simpson’s evenness |
|-----------------------|---------------|-----------------------------|--------------------|
| Seawater              |               |                             |                    |
| OH                    | 1718 (48.40)  | 10.52 (2.31)                | 0.006 (0.0007)     |
| HM                    | 1479 (27.01)  | 11.63 (0.37)                | 0.008 (0.0001)     |
| DI                    | 1143 (53.19)  | 7.39 (0.44)                 | 0.006 (0.0002)     |
| RO                    | 1198 (121.67) | 11.42 (0.64)                | 0.010 (0.0002)     |
| <i>D. antarctica</i>  |               |                             |                    |
| OH                    | 900 (99.21)   | 4.04 (1.23)                 | 0.005 (0.0014)     |
| HM                    | 913 (78.30)   | 4.85 (1.35)                 | 0.005 (0.0012)     |
| DI                    | 766 (59.18)   | 2.74 (0.74)                 | 0.004 (0.0011)     |
| RO                    | 680 (80.91)   | 2.06 (0.68)                 | 0.003 (0.0006)     |
| <i>S. antarcticus</i> |               |                             |                    |
| OH                    | 740 (21.21)   | 3.96 (0.65)                 | 0.005 (0.0007)     |
| HM                    | 697 (31.97)   | 5.41 (0.66)                 | 0.008 (0.0012)     |
| DI                    | 669 (36.61)   | 3.96 (0.39)                 | 0.006 (0.0005)     |
| RO                    | 647 (67.47)   | 3.74 (0.18)                 | 0.006 (0.0005)     |
| <i>M. acerata</i>     |               |                             |                    |
| DI                    | 653 (122.46)  | 2.90 (2.73)                 | 0.004 (0.0035)     |
| <i>H. pilosus</i>     |               |                             |                    |
| DI                    | 784 (91.24)   | 5.99 (0.55)                 | 0.008 (0.0008)     |

670

671

672

673

674

675

676

677

678 Figure 1. Taxonomic composition of bacterial communities in *Dendrilla antarctica*,  
679 *Sphaerotylus antarcticus*, *Mycale acerata*, *Hemigellius pilosus* and surrounding seawater from  
680 O'Higgins (OH), Half Moon Island (HM), Deception Island (DI) and Rothera (RO).  
681

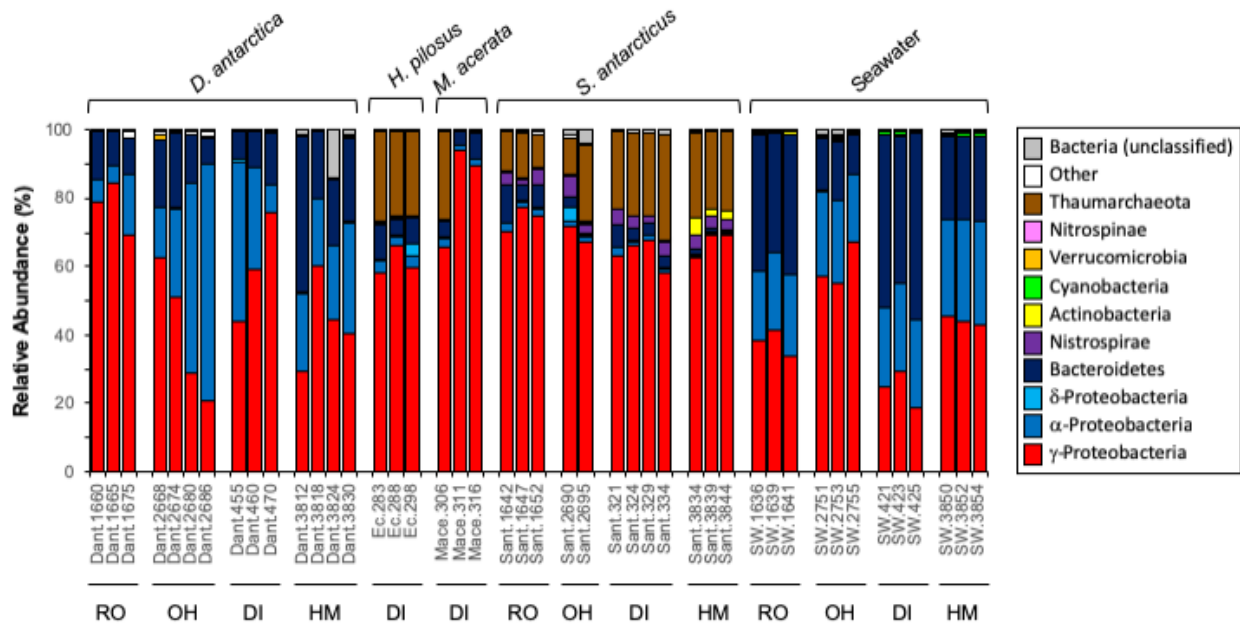

682

683

684

685

686

687

688

689

690 Figure 2. Nonmetric multi-dimensional scaling plot of microbial community structure from  
691 replicate individuals of *Dendrilla antarctica* (yellow), *Sphaerotylus antarcticus* (brown), *Mycale*  
692 *acerata* (red), *Hemigellius pilosus* (orange) and surrounding seawater (light blue) from  
693 O'Higgins (green circles), Half Moon Island (red circles), Deception Island (gray circles) and  
694 Rothera (blue circles). Stress value for two-dimensional ordination is shown.

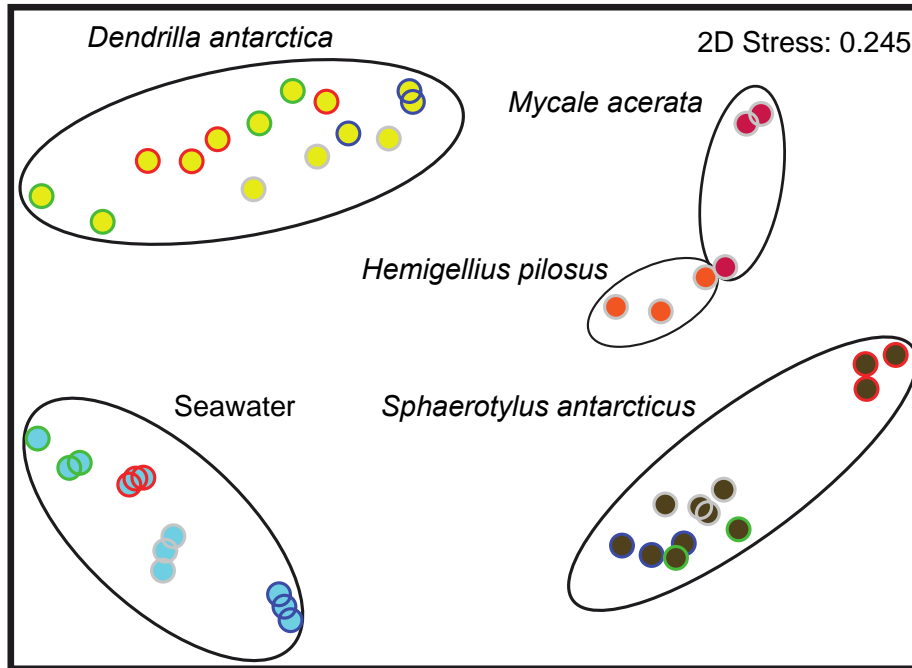

695

696

697

698

699

700

701

702

703



704 Figure 3. Bubble chart of core (underlined) and enriched variable OTUs of *Dendrilla antarctica*  
 705 (A) and *Sphaerotylus antarcticus* (B) among locations defined at >0.1% relative abundance.  
 706 OTU relative abundances are represented by the size of the bubbles (key on the top of each chart;  
 707 notice the different scale between A and B). The smallest taxonomical level for each OTU is also  
 708 shown. Location key: O’Higgins (OH), Half Moon Island (HM), Deception Island (DI) and  
 709 Rothera (RO). We also show with a green cross those OTUs enriched in seawater samples.

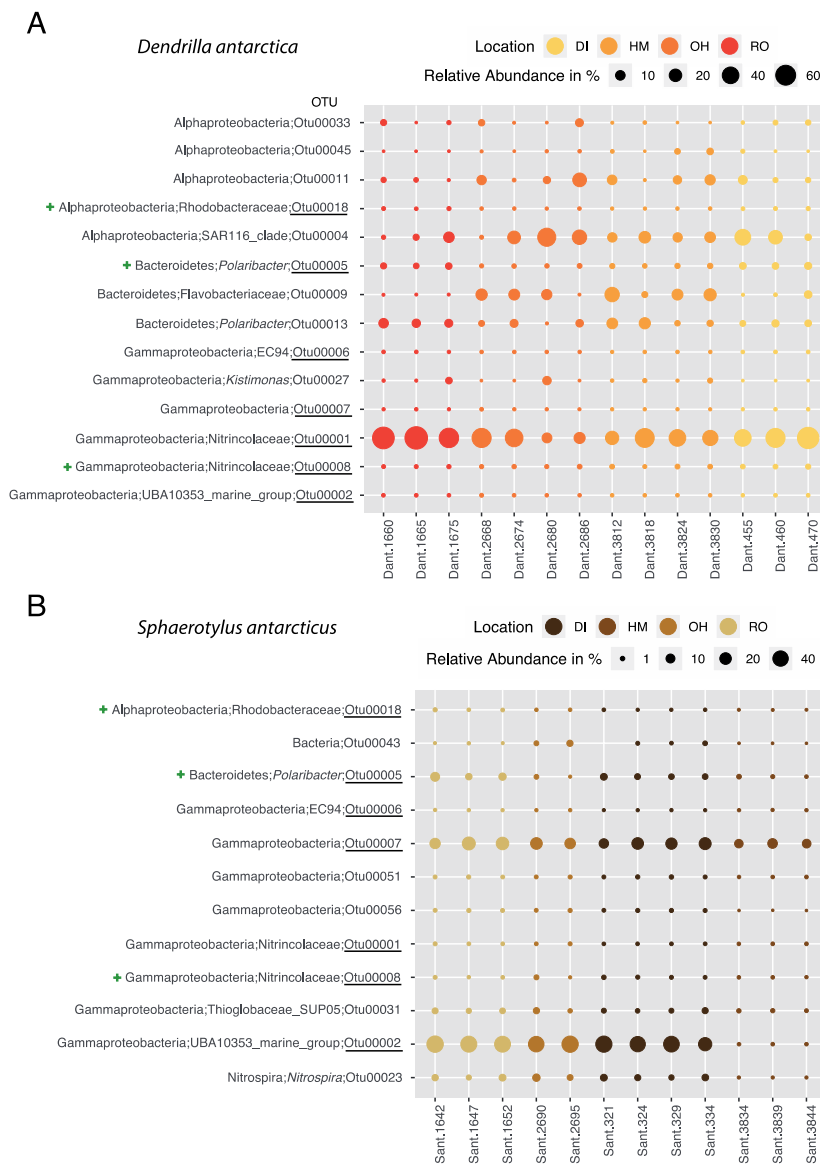

730 **Supplementary material**

731

732 Figure S1. Rarefaction curves present the relationship between the sampling effort and the  
733 microbiome OTU richness in *Dendrilla antarctica* (Dant), *Sphaerotylus antarcticus* (Sant),  
734 *Mycale acerata* (Mace), *Hemigellius pilosus* (Ec) and surrounding seawater (SW).

735

736 Figure S2. Total abundance of the microbiome OTUs recovered from sponges and seawater  
737 samples as a function of its prevalence and classified by phyla. Log scale in the x-axis.

738 Discontinuous line indicates 5% prevalence.

739

740 Figure S3. Venn diagrams showing the unique and shared microbiome OTUs among hosts (A)  
741 and including seawater samples (B) defined at distance of 0.03 (i.e., 97% similarity). *Dendrilla*  
742 *antarctica* (Dant), *Sphaerotylus antarcticus* (Sant), *Mycale acerata* (Mace), *Hemigellius pilosus*  
743 (Hpil) and seawater (SW).

744

745 Figure S4. Venn diagrams showing the unique and shared clone OTUs among hosts (A) and  
746 seawater samples (B) from Deception Island defined at distance of 0.03 (i.e., 97% similarity).

747 *Dendrilla antarctica* (Dant), *Sphaerotylus antarcticus* (Sant), *Mycale acerata* (Mace),  
748 *Hemigellius pilosus* (Hpil) and seawater (SW).

749

750 Figure S5. Total abundance of the microbiome OTUs recovered from sponge samples as a  
751 function of its prevalence and classified by phyla. Log scale in the x-axis. Discontinuous line

752 indicates 5% prevalence.

753

754 Figure S6. Total abundance of the microbiome OTUs recovered from seawater samples as a  
755 function of its prevalence and classified by phyla. Log scale in the x-axis. Discontinuous line  
756 indicates 5% prevalence.

757

758 Table S1. Core microbiome defined at 0.1% relative abundance and 90% prevalence and variable  
759 microbiome defined at 0.1% relative abundance and 10-90% prevalence. Abundances across  
760 samples are also shown at 0.1% and 1% (in some cases) relative abundances. OTUs in bold  
761 represent those with a minimum relative abundance of 1% that were found in 90% of the  
762 samples. Sources: *Dendrilla antarctica*, *Sphaerotylus antarcticus*, *Mycale acerata*, *Hemigellius*  
763 *pilosus* and seawater.

764

765 Table S2. Significantly different abundant OTUs in multiple comparisons among sources  
766 according to the false discovery rate (FDR) probabilities. Mean sequence count for the  
767 corresponding source is provided with colored values representing higher counts than the other  
768 sources compared. The taxonomy affiliation of each OTU is also shown with the percentage  
769 identity in parenthesis. Sources: sponges, seawater, *Dendrilla antarctica*, *Sphaerotylus*  
770 *antarcticus*, *Mycale acerata*, *Hemigellius pilosus*). Representing sponge Core Microbiome OTUs  
771 in bold (at 0.1% Relative Abundance and 90% Prevalence) and Variable OTUs in gray (at 0.1%  
772 Relative Abundance and 10-90% Prevalence).

773

774 File S1. Local blast results of the microbiome OTUs from *Dendrilla antarctica*, *Sphaerotylus*  
775 *antarcticus*, *Mycale acerata*, *Hemigellius pilosus* and seawater against the Sponge Earth  
776 Microbiome Project database. First hit, alignment matches and sequence identities are shown.

777 Percentage of microbiome OTUs above identity thresholds is also shown. Sponge core OTUs are  
778 represented in bold and variable OTUs in gray.

779

780 File S2. Local blast results of the clone OTUs from *Dendrilla antarctica*, *Sphaerotylus*  
781 *antarcticus*, *Mycale acerata*, *Hemigellius pilosus* and seawater against the microbiome dataset  
782 from this study. First and second hit, alignment matches and sequence identities are shown.

783 Percentage of clone OTUs above identity thresholds is also shown.

784
